# Supplementary material for: Spanish translation, cultural adaptation and validation of the SarQoL®: a specific health-related quality of life questionnaire for sarcopenia
Source: BMC Musculoskelet Disord. 2022 Mar 1;23:191. doi: 10.1186/s12891-022-05125-y (PMC8887022; doi:10.1186/s12891-022-05125-y)
Supplement: Supplementary file 1 — Additional file 1. [file 12891_2022_5125_MOESM1_ESM.pdf]

## Quality of life in sarcopenia

This questionnaire asks about **sarcopenia**, which is a **muscle weakness that comes about with ageing**. Sarcopenia can affect your daily life. This survey will enable us to find out if the state of your muscles currently **affects your quality of life**.

Please choose the **most appropriate response** for each question. The questionnaire should take you approximately 10 minutes to complete.

### 1. Do you currently feel you have a reduction in:

|                             | A lot                    | Some                     | A little                 | None                     |
|-----------------------------|--------------------------|--------------------------|--------------------------|--------------------------|
| The strength in your arms?  | <input type="checkbox"/> | <input type="checkbox"/> | <input type="checkbox"/> | <input type="checkbox"/> |
| The strength in your legs?  | <input type="checkbox"/> | <input type="checkbox"/> | <input type="checkbox"/> | <input type="checkbox"/> |
| Your muscle mass?           | <input type="checkbox"/> | <input type="checkbox"/> | <input type="checkbox"/> | <input type="checkbox"/> |
| Your energy?                | <input type="checkbox"/> | <input type="checkbox"/> | <input type="checkbox"/> | <input type="checkbox"/> |
| Your physical capabilities? | <input type="checkbox"/> | <input type="checkbox"/> | <input type="checkbox"/> | <input type="checkbox"/> |
| Your general flexibility?   | <input type="checkbox"/> | <input type="checkbox"/> | <input type="checkbox"/> | <input type="checkbox"/> |

### 2. Do you have pain in your muscles?

☐ Often

☐ Sometimes

☐ Rarely

☐ Never

3. When undertaking **light** physical activities (walking slowly, doing the ironing, dusting, washing-up, DIY, watering the garden, etc.), do you:

|                  | Often                    | Occasionally             | Rarely                   | Never                    | I do not undertake these types of physical activities |
|------------------|--------------------------|--------------------------|--------------------------|--------------------------|-------------------------------------------------------|
| Have difficulty? | <input type="checkbox"/>                              |
| Get tired?       | <input type="checkbox"/>                              |
| Experience pain? | <input type="checkbox"/>                              |

4. When undertaking **moderate** physical activities (fast walking, cleaning windows, Hoovering, washing the car, pulling up weeds in the garden, etc.), do you:

|                  | Often                    | Occasionally             | Rarely                   | Never                    | I do not undertake these types of physical activities |
|------------------|--------------------------|--------------------------|--------------------------|--------------------------|-------------------------------------------------------|
| Have difficulty? | <input type="checkbox"/>                              |
| Get tired?       | <input type="checkbox"/>                              |
| Experience pain? | <input type="checkbox"/>                              |

5. When undertaking **intense** physical activities (running, hiking, lifting heavy objects, moving furniture, digging the garden, etc.), do you:

|                  | Often                    | Occasionally             | Rarely                   | Never                    | I do not undertake these types of physical activities |
|------------------|--------------------------|--------------------------|--------------------------|--------------------------|-------------------------------------------------------|
| Have difficulty? | <input type="checkbox"/>                              |
| Get tired?       | <input type="checkbox"/>                              |
| Experience pain? | <input type="checkbox"/>                              |

6. Do you currently feel old?

|                          |                |
|--------------------------|----------------|
| <input type="checkbox"/> | Yes, very      |
| <input type="checkbox"/> | Yes, somewhat  |
| <input type="checkbox"/> | Yes, a little  |
| <input type="checkbox"/> | No, not at all |

7. If yes to question 6, what gives you that impression?

(Choose as many answers as you like)

☐ I become unwell easily

☐ I take many medications

☐ I feel a weakness in my muscles

☐ I have problems with my memory

☐ I've had to face the death of several people close to me

☐ I do not have much energy, I am often tired

☐ My eyesight is poor

☐ Other:

8. Do you feel physically weak?

☐ Yes, completely

☐ Yes, somewhat

☐ Yes, a little

☐ No, not at all

9. Do you feel you are limited in:

|                                      | A lot                    | Some                     | A little                 | None                     |
|--------------------------------------|--------------------------|--------------------------|--------------------------|--------------------------|
| The length of time you can walk for? | <input type="checkbox"/> | <input type="checkbox"/> | <input type="checkbox"/> | <input type="checkbox"/> |
| How often you go out walking?        | <input type="checkbox"/> | <input type="checkbox"/> | <input type="checkbox"/> | <input type="checkbox"/> |
| The distance you can walk?           | <input type="checkbox"/> | <input type="checkbox"/> | <input type="checkbox"/> | <input type="checkbox"/> |
| The speed at which you can walk?     | <input type="checkbox"/> | <input type="checkbox"/> | <input type="checkbox"/> | <input type="checkbox"/> |
| The length of your steps?            | <input type="checkbox"/> | <input type="checkbox"/> | <input type="checkbox"/> | <input type="checkbox"/> |

10. When you are walking:

|                                                       | Often                    | Occasionally             | Rarely                   | Never                    | I am unable to walk      |
|-------------------------------------------------------|--------------------------|--------------------------|--------------------------|--------------------------|--------------------------|
| Do you feel very tired?                               | <input type="checkbox"/> |
| Do you need to sit down regularly to recover?         | <input type="checkbox"/> |
| Do you have difficulty crossing roads quickly enough? | <input type="checkbox"/> |
| Do you have difficulties with uneven surfaces?        | <input type="checkbox"/> |

11. Do you have problems with your balance?

☐ Often

☐ Occasionally

☐ Rarely

☐ Never

12. How often do you fall?

☐ Very often

☐ Occasionally

☐ Rarely

☐ Never

13. Do you think that your physical appearance has changed?

☐ Yes, very

☐ Yes, somewhat

☐ Yes, a little

☐ No, not at all

14. If yes to question 13, in what way? (Choose as many answers as you like)

☐ Change in your weight (you've put on weight or you've lost weight)

☐ Appearance of wrinkles

☐ Loss of height

☐ Loss of muscle mass

☐ Hair loss

☐ Getting white or grey hair

☐ Other:

15. If yes to question 13, are you upset by this change?

☐ Yes, very

☐ Yes, somewhat

☐ Yes, a little

☐ No, not at all

16. Do you feel frail?

☐ Very much so

☐ A little

☐ Not at all

17. Do you currently have difficulty in undertaking any of the following daily activities:

|                                                                                               | Unable to do             | Great difficulty         | A little difficulty      | No difficulty            | Not applicable           |
|-----------------------------------------------------------------------------------------------|--------------------------|--------------------------|--------------------------|--------------------------|--------------------------|
| Climbing a flight of stairs?                                                                  | <input type="checkbox"/> |
| Climbing several flights of stairs?                                                           | <input type="checkbox"/> |
| Going up one or several steps without holding on to the banister?                             | <input type="checkbox"/> |
| Squatting or kneeling?                                                                        | <input type="checkbox"/> |
| Stooping or leaning down to pick up an object off the floor?                                  | <input type="checkbox"/> |
| Getting up from the floor without holding on to anything?                                     | <input type="checkbox"/> |
| Getting out of a low chair without armrests?                                                  | <input type="checkbox"/> |
| Moving, generally, from a sitting position to a standing position?                            | <input type="checkbox"/> |
| Carrying heavy objects (large bags full of shopping, saucepan filled with water, etc.)?       | <input type="checkbox"/> |
| Opening a bottle or a jar?                                                                    | <input type="checkbox"/> |
| Using public transport?                                                                       | <input type="checkbox"/> |
| Getting in or out of a car?                                                                   | <input type="checkbox"/> |
| Doing your shopping?                                                                          | <input type="checkbox"/> |
| Doing the housework (making the bed, Hoovering, doing the ironing, washing the dishes, etc.)? | <input type="checkbox"/> |

18. Does your muscle weakness limit your movement?

☐ Yes, a lot

☐ Yes, somewhat

☐ Yes, a little

☐ No, not at all

19. If yes to question 18, for what reasons? (Choose as many answers as you like)

☐ Fear of pain

☐ Fear that you might not be able to

☐ Fear of feeling tired after these activities

☐ Fear of falling

☐ Other:

20. Does your muscle weakness limit your sex life?

☐ I am not sexually active

☐ Yes, completely

☐ Yes, somewhat

☐ Yes, a little

☐ No, not at all

21. How has your participation in physical activities/sport changed?

☐ Increased

☐ Decreased

☐ Unchanged

☐ I have never participated in physical activities or sports

22. How has your participation in leisure activities (going out to eat, gardening, doing DIY, shooting/fishing, senior citizens clubs, playing bridge, going for a walk, etc.) changed?

☐ Increased

☐ Decreased

☐ Unchanged

☐ I have never participated in leisure activities
