# Supplementary material for: Spanish translation, cultural adaptation and validation of the SarQoL®: a specific health-related quality of life questionnaire for sarcopenia
Source: BMC Musculoskelet Disord. 2022 Mar 1;23:191. doi: 10.1186/s12891-022-05125-y (PMC8887022; doi:10.1186/s12891-022-05125-y)
Supplement: Supplementary file 2 — Additional file 2. [file 12891_2022_5125_MOESM2_ESM.pdf]

## Calidad de vida en la sarcopenia

Este cuestionario trata sobre la sarcopenia

Consiste en una debilidad muscular que aparece con la edad y que puede repercutir en su vida cotidiana. Esta encuesta nos permitirá saber si este estado muscular afecta a su calidad de vida actual.

Por favor, marque la respuesta más apropiada para cada pregunta. Responder a este cuestionario sólo le llevará unos 10 minutos.

### 1. Actualmente, ¿sufre usted una disminución:

|                           | Mucho                    | Bastante                 | Un poco                  | Nada en absoluto         |
|---------------------------|--------------------------|--------------------------|--------------------------|--------------------------|
| De fuerza en los brazos?  | <input type="checkbox"/> | <input type="checkbox"/> | <input type="checkbox"/> | <input type="checkbox"/> |
| De fuerza en las piernas? | <input type="checkbox"/> | <input type="checkbox"/> | <input type="checkbox"/> | <input type="checkbox"/> |
| De masa muscular ?        | <input type="checkbox"/> | <input type="checkbox"/> | <input type="checkbox"/> | <input type="checkbox"/> |
| De energía?               | <input type="checkbox"/> | <input type="checkbox"/> | <input type="checkbox"/> | <input type="checkbox"/> |
| De capacidades físicas?   | <input type="checkbox"/> | <input type="checkbox"/> | <input type="checkbox"/> | <input type="checkbox"/> |
| De flexibilidad muscular? | <input type="checkbox"/> | <input type="checkbox"/> | <input type="checkbox"/> | <input type="checkbox"/> |

### 2. ¿Sufre usted dolores musculares?

|                                           |
|-------------------------------------------|
| <input type="checkbox"/> Frecuentemente   |
| <input type="checkbox"/> De vez en cuando |
| <input type="checkbox"/> Casi nunca       |
| <input type="checkbox"/> Nunca            |

3. Cuando realiza esfuerzos físicos **ligeros** (andar despacio, planchar, limpiar el polvo, lavar los platos, hacer bricolaje, recoger piñas o frutos en el jardín, regar el jardín, etc.) ¿se resiente:

|                   | Frecuentemente           | De vez en cuando         | Casi nunca               | Nunca                    | Nunca realizo esfuerzos físicos de este tipo |
|-------------------|--------------------------|--------------------------|--------------------------|--------------------------|----------------------------------------------|
| De la dificultad? | <input type="checkbox"/>                     |
| Del cansancio?    | <input type="checkbox"/>                     |
| Del dolor?        | <input type="checkbox"/>                     |

4. Cuando realiza esfuerzos físicos **moderados** (andar rápido, limpiar los cristales, pasar el aspirador, lavar el coche, arrancar las malas hierbas del jardín, etc.) ¿se resiente:

|                   | Frecuentemente           | De vez en cuando         | Casi nunca               | Nunca                    | Nunca realizo esfuerzos físicos de este tipo |
|-------------------|--------------------------|--------------------------|--------------------------|--------------------------|----------------------------------------------|
| De la dificultad? | <input type="checkbox"/>                     |
| Del cansancio?    | <input type="checkbox"/>                     |
| Del dolor?        | <input type="checkbox"/>                     |

5. Cuando realiza esfuerzos físicos **importantes** (correr, hacer una excursión, levantar objetos pesados, mudarse, cavar en el jardín, etc.), ¿se resiente:

|                   | Frecuentemente           | De vez en cuando         | Casi nunca               | Nunca                    | Nunca realizo esfuerzos físicos de este tipo |
|-------------------|--------------------------|--------------------------|--------------------------|--------------------------|----------------------------------------------|
| De la dificultad? | <input type="checkbox"/>                     |
| Del cansancio?    | <input type="checkbox"/>                     |
| Del dolor?        | <input type="checkbox"/>                     |

6. Actualmente, ¿tiene usted el sentimiento de ser mayor?

☐ Sí, totalmente

☐ Sí, bastante

☐ Sí, un poco

☐ No, en absoluto

7. Si la respuesta es sí, ¿qué es lo que le produce esta impresión?

(Puede elegir varias respuestas)

☐ Caigo enfermo más fácilmente

☐ Tomo muchos medicamentos

☐ Siento debilidad muscular

☐ Tengo problemas de memoria

☐ Varias personas cercanas han fallecido

☐ Tengo menos energía, me canso más a menudo

☐ Mi vista ha empeorado

☐ Otro:

8. ¿Se siente físicamente débil?

☐ Sí, totalmente

☐ Bastante

☐ Un poco

☐ Nada en absoluto

9. Actualmente, ¿sufre limitación en:

|                                                 | Mucho                    | Bastante                 | Un poco                  | Nada en absoluto         |
|-------------------------------------------------|--------------------------|--------------------------|--------------------------|--------------------------|
| El tiempo de paseo?                             | <input type="checkbox"/> | <input type="checkbox"/> | <input type="checkbox"/> | <input type="checkbox"/> |
| El número de veces que va andando a los sitios? | <input type="checkbox"/> | <input type="checkbox"/> | <input type="checkbox"/> | <input type="checkbox"/> |
| Las distancias de los paseos?                   | <input type="checkbox"/> | <input type="checkbox"/> | <input type="checkbox"/> | <input type="checkbox"/> |
| La velocidad de su marcha?                      | <input type="checkbox"/> | <input type="checkbox"/> | <input type="checkbox"/> | <input type="checkbox"/> |
| La longitud de sus pasos?                       | <input type="checkbox"/> | <input type="checkbox"/> | <input type="checkbox"/> | <input type="checkbox"/> |

10. Cuando anda...

|                                                                                   | Frecuentemente           | De vez en cuando         | Casi nunca               | Nunca                    | Ya no ando               |
|-----------------------------------------------------------------------------------|--------------------------|--------------------------|--------------------------|--------------------------|--------------------------|
| ¿Siente una fatiga importante?                                                    | <input type="checkbox"/> |
| ¿Necesita sentarse regularmente para recuperarse?                                 | <input type="checkbox"/> |
| ¿Tiene dificultades para cruzar una carretera o una calle suficientemente rápido? | <input type="checkbox"/> |
| ¿Tiene dificultades en terrenos irregulares?                                      | <input type="checkbox"/> |

11. ¿Tiene problemas de equilibrio?

- ☐ Frecuentemente
- ☐ De vez en cuando
- ☐ Casi nunca
- ☐ Nunca

12. ¿Se cae?

- ☐ Frecuentemente
- ☐ De vez en cuando
- ☐ Casi nunca
- ☐ Nunca

13. ¿Cree usted que su aspecto físico ha cambiado?

- ☐ Sí, totalmente
- ☐ Sí, bastante
- ☐ Sí, un poco
- ☐ No, en absoluto

14. Si la respuesta es sí, ¿de qué manera?

(Puede elegir varias respuestas)

- ☐ Cambios en el peso (aumento o pérdida de peso)
- ☐ Aparición de arrugas
- ☐ Disminución de la talla (altura)
- ☐ Pérdida de masa muscular
- ☐ Pérdida de pelo
- ☐ Aparición de canas/pelo gris
- ☐ Otro:

15. Si la respuesta es sí, ¿se siente inquieto por este cambio?

- ☐ Mucho
- ☐ Bastante
- ☐ Un poco
- ☐ Nada

16. ¿Tiene la sensación de ser frágil?

- ☐ Sí, totalmente
- ☐ Un poco
- ☐ Nada en absoluto

17. Actualmente, ¿tiene dificultades para realizar estas actividades de la vida cotidiana?

|                                                                                                        | Totalmente incapaz       | Mucha dificultad         | Poca dificultad          | Sin dificultad           | Nunca realizo esta actividad |
|--------------------------------------------------------------------------------------------------------|--------------------------|--------------------------|--------------------------|--------------------------|------------------------------|
| Subir un tramo de escaleras                                                                            | <input type="checkbox"/>     |
| Subir varios tramos de escaleras                                                                       | <input type="checkbox"/>     |
| Subir uno o varios escalones sin barandilla                                                            | <input type="checkbox"/>     |
| Ponerse de cuclillas o arrodillarse                                                                    | <input type="checkbox"/>     |
| Agacharse o inclinarse para recoger un objeto del suelo                                                | <input type="checkbox"/>     |
| Levantarse del suelo sin apoyo                                                                         | <input type="checkbox"/>     |
| Levantarse de un sillón bajo o una silla sin reposabrazos                                              | <input type="checkbox"/>     |
| Pasar, de forma general, de estar sentado a ponerse de pie                                             | <input type="checkbox"/>     |
| Cargar objetos pesados (bolsa de la compra grande, cacerola llena de agua, etc...)                     | <input type="checkbox"/>     |
| Abrir una botella o un tarro                                                                           | <input type="checkbox"/>     |
| Utilizar el transporte público                                                                         | <input type="checkbox"/>     |
| Subir o bajar de un coche                                                                              | <input type="checkbox"/>     |
| Hacer la compra                                                                                        | <input type="checkbox"/>     |
| Hacer las tareas del hogar, como hacer la cama, pasar el aspirador, planchar, lavar los platos, etc... | <input type="checkbox"/>     |

18. ¿La debilidad muscular limita sus movimientos?

- ☐ Sí, mucho
- ☐ Sí, bastante
- ☐ Sí, un poco
- ☐ No, nada

19. Si la respuesta es sí, ¿por qué razones? (Puede elegir varias respuestas)

- ☐ Por miedo de hacerse daño
- ☐ Por miedo a no poder hacerlo
- ☐ Por miedo a estar cansado después de estas actividades
- ☐ Por miedo a caerse
- ☐ Otros:

20. ¿Su debilidad muscular le impide llevar una vida sexual satisfactoria?

- ☐ Ya no tengo la ocasión de tener vida sexual
- ☐ Sí, totalmente
- ☐ Bastante
- ☐ Un poco
- ☐ Nada en absoluto

21. ¿Ha modificado la práctica de actividad física/deportiva?

- ☐ Ha aumentado
- ☐ Ha disminuido
- ☐ No se ha modificado
- ☐ Nunca he practicado actividad física o deportiva

22. ¿Ha modificado la práctica de actividades de ocio (salir a comer, jardinería, bricolaje, caza/pesca, clubs de jubilados, cartas, pasear, etc.)?

- ☐ Ha aumentado
- ☐ Ha disminuido
- ☐ No se ha modificado
- ☐ Nunca he practicado actividades de ocio
